# Supplementary material
Source: publisher site journal article supplement (http://www.kjim.org/upload/media/kjim-2019-160-suppl1.pdf)
Supplement: Supplementary file 1 [file kjim-2019-160-suppl1.pdf]

**Supplementary Table 1. The quartile value of each variables**

| Variable                      | Q1     | Q2 (median) | Q3      |
|-------------------------------|--------|-------------|---------|
| TSH, uIU/mL                   | 1.501  | 2.251       | 3.248   |
| FT4, ng/dL                    | 1.125  | 1.232       | 1.344   |
| Urine iodine creatinine ratio | 99.121 | 170.586     | 399.300 |
| Fasting glucose, mg/dL        |        | 92.883      |         |
| Fasting insulin, uIU/mL       |        | 6.267       |         |
| HOMA-IR                       |        | 1.466       |         |
| HbA <sub>1c</sub> , %         |        | 5.385       |         |

TSH, thyrotropin; FT4, free thyroxine; HOMA-IR, homeostasis model assessment of insulin resistance; HbA<sub>1c</sub>, hemoglobin A<sub>1c</sub>.
